# Supplementary material for: Open Data Policy, E-Commerce Connectivity and Portfolio Size Predict a Global Brand’s Online Popularity
Source: Preprints.org preprint supplement (doi:10.20944/preprints202209.0470.v1), 2022-09-30
Supplement: Supplementary file 1 [file supplementary]

## Sheet: Blad1
Brand	Reviews score	Data Health	Downloads	Platforms	Open data policy	Products	Categories	Products/Category
ACT	1	0.41	4128234	82	1	5747	101	56.901
Datalogic	1	0.41	2514893	101	0	18219	110	165.627
FUNKO	1	0.3	915014	30	0	9273	17	545.471
HQ	1	0.4	837104	19	0	4415	179	24.6648
Durable	0.97	0.44	1038507	34	0	3971	156	25.4551
Mellanox Technologies	0.95	0.5	2440419	28	0	7794	25	311.76
Chief	0.94	0.43	3643514	85	1	11919	63	189.19
Ravensburger	0.94	0.27	3402857	99	1	10879	77	141.286
Danfoss	0.94	0.2	928424	10	0	8834	14	631
Sophos	0.93	0.24	13819658	78	1	63612	35	1817.49
Centon	0.93	0.43	1596205	29	0	14489	24	603.708
Bauknecht	0.93	0.2	1149869	16	0	3706	37	100.162
Vertiv	0.92	0.42	4873950	104	1	12666	98	129.245
Maybelline	0.92	0.35	2042938	39	0	3435	44	78.0682
HEAD	0.92	0.4	824771	4	0	5985	65	92.0769
Aruba, a Hewlett Packard Enterprise company	0.91	0.49	6124111	93	0	34158	59	578.949
Liebherr	0.91	0.33	1796662	52	0	5456	18	303.111
itek	0.91	0.43	969791	43	1	639	51	12.5294
Da-Lite	0.9	0.42	1962435	52	1	7565	51	148.333
Gedore	0.9	0.34	1117854	14	0	18161	132	137.583
Yealink	0.9	0.44	820119	146	1	3267	54	60.5
be quiet!	0.89	0.51	1097290	117	1	747	9	83
RAM Mounts	0.88	0.26	1903701	85	1	6632	77	86.1299
EMC	0.88	0.42	1889420	23	1	85884	32	2683.88
G.Skill	0.88	0.46	1490471	115	0	2901	12	241.75
WatchGuard	0.88	0.44	1394682	42	0	8120	24	338.333
Sencor	0.88	0.39	898158	26	0	1842	123	14.9756
Mars Gaming	0.88	0.47	896160	56	1	833	36	23.1389
Hikvision Digital Technology	0.87	0.39	4061438	81	1	20506	179	114.559
Supermicro	0.87	0.38	3577751	64	0	21592	95	227.284
Ewent	0.87	0.44	2012624	108	1	1495	104	14.375
Arcserve	0.87	0.4	1099956	5	0	10714	11	974
DJI	0.87	0.4	1044174	67	0	6709	88	76.2386
Fortinet	0.86	0.49	5865084	45	0	65301	55	1187.29
Corsair	0.86	0.43	3559748	139	0	8172	69	118.435
ASICS	0.86	0.4	2234734	16	0	29028	40	725.7
Nvidia	0.86	0.45	1836963	31	0	32835	45	729.667
Pilot	0.86	0.33	1165067	23	0	5282	38	139
Goodram	0.86	0.39	944842	94	1	1899	11	172.636
Little Tikes	0.86	0.42	843740	44	1	838	44	19.0455
QNAP	0.85	0.3	13855841	257	1	45679	73	625.74
Synology	0.85	0.44	3491865	136	0	18141	54	335.944
Brodit	0.85	0.42	3067638	29	0	14490	39	371.538
EIZO	0.85	0.29	1641960	121	1	1755	43	40.814
MaxFlash	0.85	0.49	1325529	6	0	11003	9	1222.56
Asrock	0.85	0.4	1272238	87	0	3059	27	113.296
ARCTIC	0.85	0.51	1118470	118	1	1130	54	20.9259
Antec	0.85	0.41	847604	61	0	2606	63	41.3651
Apple	0.84	0.39	134389906	265	0	2651018	197	13456.9
Gigabyte	0.84	0.38	9336887	319	1	11612	87	133.471
LEGO	0.84	0.44	8944879	95	1	22166	34	651.941
Steam	0.84	0.4	4396849	5	0	70522	3	23507.3
Axiom	0.84	0.44	3090846	29	0	19942	55	362.582
Cooler Master	0.84	0.42	2351734	122	0	3991	60	66.5167
Thule	0.84	0.41	1643751	93	1	3784	69	54.8406
Hansgrohe	0.84	0.4	1468464	5	0	21272	41	518.829
Panda	0.84	0.25	1221089	33	1	5829	11	529.909
Crucial	0.84	0.43	1214082	126	0	4454	18	247.444
Thermaltake	0.84	0.42	1093038	74	0	3513	74	47.473
Kenwood	0.84	0.34	899807	68	0	2955	84	35.1786
Sapphire	0.84	0.4	836200	95	0	2388	47	50.8085
MSI	0.83	0.4	29097822	387	1	43111	88	489.898
Tripp Lite	0.83	0.5	14077159	140	1	10292	189	54.455
Kingston Technology	0.83	0.43	5141863	150	0	13081	27	484.481
POLY	0.83	0.45	4196709	112	0	27650	142	194.718
Cellularline	0.83	0.4	3832231	136	1	8662	86	100.721
CLUB3D	0.83	0.38	2411447	105	1	1149	24	47.875
Quantum	0.83	0.45	1900291	19	0	31031	52	596.75
Ergotron	0.83	0.46	1910009	67	0	3270	79	41.3924
AMD	0.83	0.39	1831116	106	0	3965	19	208.684
ADATA	0.83	0.42	1697652	86	0	4003	33	121.303
AVM	0.83	0.31	1458063	117	1	606	27	22.4444
Aerocool	0.83	0.42	1374232	101	1	2265	35	64.7143
Nimble Storage	0.83	0.4	1363569	2	0	14184	6	2364
Razer	0.83	0.4	1359293	109	0	3754	80	46.925
Manfrotto	0.83	0.42	1212330	49	0	3455	79	43.7342
Vogel's	0.83	0.45	1169887	66	1	4532	66	68.6667
Value	0.83	0.36	884961	34	0	3559	164	21.7012
Intel	0.82	0.43	21123775	381	1	33397	113	295.549
AEG	0.82	0.23	7322975	104	0	16491	237	69.5823
DeLOCK	0.82	0.44	3360374	81	0	14303	284	50.3627
Neff	0.82	0.25	2375058	47	1	4797	58	82.7069
Pioneer	0.82	0.39	1855373	66	0	9921	117	84.7949
Sennheiser	0.82	0.39	1793851	49	0	7377	104	70.9327
Yamaha	0.82	0.42	1456767	75	0	4978	134	37.1493
CA	0.82	0.4	1069078	7	0	9242	19	486.421
Wacom	0.82	0.4	1050453	99	0	1882	56	33.6071
Ubiquiti Networks	0.82	0.41	905583	102	0	3294	78	42.2308
Zotac	0.82	0.4	837304	61	0	1726	35	49.3143
ASUS	0.8147	0.4	117669323	546	1	195323	201	971.756
Symantec	0.81	0.21	18748262	37	1	166439	39	4267.67
Logitech	0.81	0.27	16968563	414	1	12886	112	115.054
APC	0.81	0.4	15521998	299	1	22405	192	116.693
Huawei	0.81	0.25	8235328	324	1	24659	152	162.23
Xiaomi	0.81	0.38	7391425	198	0	7258	159	45.6478
Seagate	0.81	0.37	6948695	340	1	10371	45	230.467
TP-Link	0.81	0.4	6124740	400	1	3488	68	51.2941
Veritas	0.81	0.48	5597493	17	0	233696	19	12299.8
Western Digital	0.81	0.4	3527893	147	0	9678	53	182.604
ATEN	0.81	0.46	3421109	144	1	5837	101	57.7921
Spin Master	0.81	0.42	3317705	91	1	4002	63	63.5238
TomTom	0.81	0.34	3284657	135	1	3447	55	62.6727
SanDisk	0.81	0.43	2919012	121	0	9229	38	242.868
Alienware	0.81	0.39	2375992	149	1	5155	20	257.75
Peerless	0.81	0.45	1328581	84	1	4935	67	73.6567
Silicon Power	0.81	0.32	1178923	91	1	2133	22	96.9545
Monacor	0.81	0.42	1045390	16	0	4445	158	28.1329
Zalman	0.81	0.35	859945	54	1	1151	42	27.4048
Bosch	0.8	0.26	27993646	254	1	80591	555	145.209
Panasonic	0.8	0.33	12783184	188	0	59110	454	130.198
Extreme networks	0.8	0.5	12706895	45	0	148334	72	2060.19
StarTech.com	0.8	0.46	10813831	259	1	9292	187	49.6898
Zebra	0.8	0.43	8962829	144	0	77421	211	366.924
Neomounts by Newstar	0.8	0.54	7256214	186	1	2208	56	39.4286
Braun	0.8	0.33	5246152	181	1	6668	99	67.3535
Juniper	0.8	0.48	3353068	27	0	37624	62	606.839
Phoenix	0.8	0.35	3074029	21	0	22885	182	125.742
Fellowes	0.8	0.34	3007613	160	1	5506	166	33.1687
Nike	0.8	0.42	2787939	7	0	57370	63	910.635
Axis	0.8	0.42	2714300	82	0	7655	162	47.2531
Nintendo	0.8	0.35	2622258	159	1	12628	63	200.444
Garmin	0.8	0.37	2539090	119	0	7170	133	53.9098
OPPO	0.8	0.27	2396917	182	1	1411	18	78.3889
Manhattan	0.8	0.39	2283281	193	1	4666	188	24.8191
InLine	0.8	0.38	2124331	42	0	13940	260	53.6154
Oral-B	0.8	0.37	2100691	140	1	2533	12	211.083
Dell Wyse	0.8	0.35	1759352	78	1	2230	56	39.8214
Brady	0.8	0.43	1718954	11	0	23058	47	490.596
Intermec	0.8	0.41	1361851	52	0	8689	87	99.8736
Ruckus Wireless	0.8	0.46	1354620	8	0	9897	32	309.281
Spigen	0.8	0.47	1291128	78	0	6096	43	141.767
Eminent	0.8	0.36	1217644	53	1	1128	117	9.64103
Esprit	0.8	0.2	1225450	6	0	111875	41	2728.66
McKinley	0.8	0.39	1116016	5	0	6364	71	89.6338
Incipio	0.8	0.42	1050704	70	0	6410	56	114.464
Cartier	0.8	0.21	1000630	9	0	9194	48	191.542
BaByliss	0.8	0.28	918768	40	0	1187	30	39.5667
Samsung	0.7939	0.32	187605375	655	1	213462	368	580.06
Lenovo	0.7918	0.28	173857821	627	1	736748	253	2912.05
DELL	0.79	0.41	132816537	498	1	285108	276	1033
Sony	0.79	0.35	94005003	355	1	230557	419	550.255
Epson	0.79	0.29	38242893	458	1	58511	193	303.166
Canon	0.79	0.3	33089257	486	1	125371	228	549.873
NETGEAR	0.79	0.25	8717994	250	1	6954	91	76.4176
Origin Storage	0.79	0.45	7333636	109	1	18490	109	169.633
Beko	0.79	0.27	6291429	164	1	9827	59	166.559
Legrand	0.79	0.26	6181894	84	1	51424	176	292.182
Targus	0.79	0.4	5807994	286	1	8892	127	70.0157
Electrolux	0.79	0.22	5720254	94	0	14479	159	91.0629
Miele	0.79	0.25	5353605	71	0	14602	132	110.621
AOC	0.79	0.36	3688300	238	1	1609	35	45.9714
Jabra	0.79	0.48	3140329	186	1	5385	69	78.0435
Transcend	0.79	0.44	3084048	103	0	10720	40	268
Benq	0.79	0.34	2821341	121	0	6176	86	71.814
iiyama	0.79	0.38	2631193	169	1	1833	29	63.2069
SonicWall	0.79	0.42	2319718	66	0	11249	52	216.327
KitchenAid	0.79	0.34	1763872	88	1	3364	96	35.0417
JBL	0.79	0.39	1708635	100	0	5180	40	129.5
Activision	0.79	0.39	1479492	53	0	8631	20	431.55
Krusell	0.79	0.39	1229921	72	0	5810	25	232.4
Check Point Software Technologies	0.79	0.44	1221484	14	0	21169	31	682.871
Anker	0.79	0.25	1154805	122	1	2607	70	37.2429
Fisher-Price	0.79	0.34	1133876	84	1	3774	77	49.013
Philips	0.78	0.37	115547704	404	1	87026	554	157.087
Microsoft	0.78	0.24	41203902	431	1	329777	155	2127.59
Philips by Signify	0.78	0.36	12735918	146	1	11477	52	220.712
Eaton	0.78	0.38	7975218	192	1	52970	165	321.03
Getac	0.78	0.4	5048968	62	0	31609	56	564.446
Philips AVENT	0.78	0.47	3338030	70	1	2131	73	29.1918
Hasbro	0.78	0.39	3211727	111	1	14613	76	192.276
WMF	0.78	0.32	2222968	73	1	5605	245	22.8776
HTC	0.78	0.37	1528573	53	0	4281	55	77.8364
PNY	0.78	0.42	1463224	138	0	5292	74	71.5135
SBS	0.78	0.42	1346535	94	0	6291	108	58.25
Samsonite	0.78	0.38	1315045	32	0	7631	53	143.981
Saeco	0.78	0.34	1296645	46	1	755	11	68.6364
Gardena	0.78	0.36	1237020	31	0	4353	128	34.0078
Wortmann AG	0.78	0.23	1209539	26	0	5883	61	96.4426
Creative Labs	0.78	0.4	1189483	49	0	2859	69	41.4348
Rexel	0.78	0.44	1156908	34	0	2708	83	32.6265
Mobotix	0.78	0.4	918062	22	0	2443	55	44.4182
EPOS	0.78	0.53	851472	97	1	1170	32	36.5625
LG	0.7794	0.23	43519510	449	1	34184	206	165.942
Cisco	0.77	0.48	88122963	194	0	1093556	279	3919.56
Hewlett Packard Enterprise	0.77	0.48	87095465	209	0	409246	248	1650.19
Fujitsu	0.77	0.37	58273336	264	1	225348	269	837.725
IBM	0.77	0.38	17676356	64	0	394657	181	2180.43
D-Link	0.77	0.38	7447629	254	1	5707	105	54.3524
Tefal	0.77	0.35	6859596	156	1	8976	176	51
NEC	0.77	0.37	6303041	74	0	16723	134	124.799
MEDION	0.77	0.31	5944479	115	1	6389	167	38.2575
Smeg	0.77	0.3	5815477	82	0	10114	87	116.253
Zyxel	0.77	0.33	5141159	192	1	6648	83	80.0964
Schneider Electric	0.77	0.33	4874790	91	1	87096	188	463.277
VTech	0.77	0.34	3108602	88	1	4743	74	64.0946
Case Logic	0.77	0.35	3022256	124	1	4789	62	77.2419
Motorola	0.77	0.22	2595753	199	1	6004	78	76.9744
Honeywell	0.77	0.4	2508713	119	0	37848	233	162.438
Barracuda Networks	0.77	0.45	2360931	15	0	28361	30	945.367
CHERRY	0.77	0.36	2281371	141	1	3917	21	186.524
Duracell	0.77	0.4	1904213	130	1	4385	46	95.3261
Celly	0.77	0.42	1787875	100	0	7234	94	76.9574
Monoprice	0.77	0.47	1615334	34	0	10312	247	41.749
Hisense	0.77	0.26	1405972	85	0	2744	48	57.1667
Linksys	0.77	0.28	1373595	56	0	2299	71	32.3803
Shuttle	0.77	0.4	1229179	119	1	2538	47	54
PURO	0.77	0.37	1095942	73	0	5926	51	116.196
SPEEDLINK	0.77	0.39	959655	61	0	2894	119	24.3193
HP	0.7693	0.39	397180194	707	1	1253807	459	2731.61
Acer	0.76	0.24	132589441	460	1	191567	190	1008.25
Whirlpool	0.76	0.29	15628513	139	1	11843	93	127.344
Trend Micro	0.76	0.32	15202594	32	1	90707	14	6479.07
Belkin	0.76	0.25	13472362	263	1	25984	239	108.72
Hama	0.76	0.39	12327726	144	0	53371	753	70.8778
Xerox	0.76	0.38	12059999	315	1	31956	120	266.3
V7	0.76	0.4	5548675	157	1	9837	144	68.3125
Candy	0.76	0.36	5201569	134	1	7038	32	219.938
Ricoh	0.76	0.37	3156775	76	0	26729	110	242.991
Empire	0.76	0.41	3145292	33	0	18925	47	402.66
Leitz	0.76	0.44	2860571	97	1	5685	120	47.375
Conceptronic	0.76	0.34	2209232	106	1	2328	113	20.6018
Buffalo	0.76	0.34	2191507	96	1	6887	78	88.2949
Princess	0.76	0.41	2040742	107	1	1802	121	14.8926
LogiLink	0.76	0.41	1840181	74	0	8371	279	30.0036
Krups	0.76	0.28	1795376	137	1	1768	55	32.1455
ZAGG	0.76	0.24	1735134	145	1	6814	58	117.483
Olympus	0.76	0.39	1645300	51	0	5239	101	51.8713
Gorenje	0.76	0.23	1587581	54	0	6434	91	70.7033
Stanley	0.76	0.32	1290463	32	0	9111	163	55.8957
Speck	0.76	0.26	1168888	100	1	4234	37	114.432
TCL	0.76	0.34	919409	113	0	1588	25	63.52
Adobe	0.75	0.4	9494550	42	0	71534	43	1663.58
Trust	0.75	0.34	6584128	238	1	6199	173	35.8324
Sharp	0.75	0.25	4698803	187	1	8585	124	69.2339
Adidas	0.75	0.39	4320868	60	0	59869	95	630.2
Hoover	0.75	0.37	3094773	133	1	6139	51	120.373
Sandberg	0.75	0.43	3026509	116	1	2361	139	16.9856
Viewsonic	0.75	0.25	2993567	179	1	4655	104	44.7596
Intellinet	0.75	0.44	2291899	116	1	5076	89	57.0337
Techly	0.75	0.44	2090784	80	1	5703	191	29.8586
Verbatim	0.75	0.32	1731991	112	0	5436	104	52.2692
Deltaco	0.75	0.4	1456330	55	0	5493	179	30.6872
Avaya	0.75	0.41	1262279	24	0	15750	81	194.444
Inventum	0.75	0.39	1100266	37	1	1010	77	13.1169
Nilox	0.75	0.24	1099186	63	0	5708	221	25.8281
Severin	0.75	0.36	1079499	59	0	3256	100	32.56
DYMO	0.75	0.4	969022	87	0	2035	40	50.875
Toshiba	0.74	0.33	82954338	292	1	219306	243	902.494
Brother	0.74	0.37	15302630	401	1	46935	139	337.662
Siemens	0.74	0.24	14462694	172	1	87167	311	280.28
Indesit	0.74	0.26	5729849	128	1	5241	30	174.7
Kensington	0.74	0.39	5498582	271	1	9383	187	50.1765
OKI	0.74	0.39	5419890	88	0	19262	91	211.67
Lindy	0.74	0.37	5006654	116	1	10455	256	40.8398
Digitus	0.74	0.44	4985516	108	0	11587	243	47.6831
Grundig	0.74	0.26	3598711	83	1	4440	135	32.8889
Under Armour	0.74	0.35	3061922	5	0	32714	47	696.043
Diadora	0.74	0.4	2391266	4	0	39489	27	1462.56
Packard Bell	0.74	0.32	2341750	12	0	10162	63	161.302
Hitachi	0.74	0.33	2189949	42	0	28161	163	172.767
Varta	0.74	0.24	1935715	143	1	2980	34	87.6471
Tristar	0.74	0.47	1904245	83	1	1628	118	13.7966
Osram	0.74	0.33	1742453	49	0	17305	78	221.859
Gigaset	0.74	0.36	1267382	98	0	3897	69	56.4783
Revell	0.74	0.31	1093430	56	1	4576	44	104
Sitecom	0.74	0.41	907483	37	0	1157	72	16.0694
Nokia	0.73	0.39	6053799	124	0	14672	92	159.478
Hotpoint	0.73	0.28	5107816	109	1	7326	67	109.343
Konica Minolta	0.73	0.38	3686839	46	0	58256	67	869.493
Casio	0.73	0.36	2645408	66	0	8794	83	105.952
Bitdefender	0.73	0.38	2279956	16	0	24133	8	3016.62
Massive	0.73	0.35	2079084	6	0	6377	20	318.85
Zanussi	0.73	0.25	1573275	25	0	4402	53	83.0566
Iomega	0.73	0.36	1136166	29	1	1279	44	29.0682
Genius	0.73	0.38	997018	30	0	3780	87	43.4483
Maxell	0.73	0.4	938754	45	0	4062	91	44.6374
Pinnacle	0.73	0.39	936487	40	1	954	41	23.2683
Macally	0.73	0.39	824067	54	1	1569	78	20.1154
Rowenta	0.72	0.27	4004771	147	1	3247	69	47.058
Mattel	0.72	0.33	2620801	115	1	7712	65	118.646
LevelOne	0.72	0.4	2163521	78	1	3648	92	39.6522
Integral	0.72	0.41	2106567	79	1	11557	16	722.312
Alcatel	0.72	0.37	1993265	92	0	14617	85	171.965
3com	0.72	0.33	1550028	15	0	2388	55	43.4182
Ariete	0.72	0.38	1520047	99	1	1276	88	14.5
Chicco	0.72	0.3	1391163	76	1	7971	216	36.9028
New Balance	0.72	0.41	1351433	14	0	63049	19	3318.37
HUGO BOSS	0.72	0.4	1197007	16	0	26703	77	346.792
Brabantia	0.72	0.44	1089448	25	0	3153	121	26.0579
Alcatel-Lucent	0.72	0.44	857354	29	0	6667	65	102.569
Lexmark	0.71	0.39	15583310	239	1	42804	90	475.6
Reebok	0.71	0.31	4399321	6	0	53007	51	1039.35
Denver	0.71	0.37	1011689	55	0	1913	101	18.9406
KYOCERA	0.7	0.39	10066625	231	1	75384	82	919.317
DC Shoes	0.7	0.33	1543871	2	0	20022	11	1820.18
Playmobil	0.7	0.38	1523195	50	1	4205	26	161.731
Gembird	0.7	0.4	1418004	62	0	3942	164	24.0366
Kodak	0.7	0.4	1253202	75	0	5843	105	55.6476
Hannspree	0.7	0.33	1237107	114	1	769	34	22.6176
hummel	0.7	0.4	1054634	3	0	32680	48	680.833
Salora	0.7	0.38	848174	56	1	1022	59	17.322
3M	0.69	0.41	16597780	191	1	51746	337	153.549
Tucano	0.69	0.38	1051891	80	0	4325	61	70.9016
Jumbo	0.68	0.47	2795663	66	1	2383	40	59.575
Dicota	0.68	0.41	1018812	88	0	2631	63	41.7619
BANDAI NAMCO Entertainment	0.68	0.4	913597	45	0	5257	20	262.85
Haier	0.67	0.37	2114197	103	1	2841	58	48.9828
Fagor	0.67	0.23	1276972	8	0	3418	109	31.3578
Noreve	0.67	0.47	901864	22	0	6758	17	397.529
Thomson	0.66	0.31	2155655	101	1	2006	110	18.2364
NGS	0.66	0.4	1441876	112	1	1685	88	19.1477
Intex	0.66	0.33	913778	40	0	2439	86	28.3605
Walimex	0.66	0.4	912324	22	0	4510	95	47.4737
Moulinex	0.65	0.25	1399248	97	1	1628	70	23.2571
Sweex	0.65	0.4	1270337	22	0	2218	107	20.729
PUMA	0.64	0.38	1486935	19	0	34015	61	557.623
Carrefour	0.63	0.28	801886	15	0	2490	402	6.19403
Activejet	0.63	0.41	799528	38	0	2936	58	50.6207
Nedis	0.62	0.47	1212843	58	0	6987	335	20.8567
C2G	0.6	0.42	8183787	126	1	23480	160	146.75
Projecta	0.6	0.46	4599313	36	1	11314	43	263.116
Hager	0.6	0.24	1641299	14	0	29251	107	273.374
Clementoni	0.6	0.27	978017	61	0	6948	76	91.4211
Katun	0.6	0.4	883357	15	0	7412	29	255.586
Hypertec	0.59	0.38	1844766	17	0	15156	138	109.826
Qilive	0.57	0.31	944052	27	0	1652	199	8.30151
BTI	0.55	0.4	7138978	45	0	56245	23	2445.43
Disney	0.54	0.21	871361	20	0	19159	116	165.164
MM	0.53	0.31	3269782	31	1	2288	10	228.8
Muvit	0.53	0.31	1156772	52	0	6644	73	91.0137
PowerQ	0.5	0.34	891709	15	0	4845	4	1211.25
Bahco	0.5	0.31	855492	10	0	29133	204	142.809
Preo	0.2	0.21	866571	27	0	1443	63	22.9048
